# Supplementary material for: The importance of the cerebro-placental ratio at term for predicting adverse perinatal outcomes in appropriate for gestational age fetuses
Source: publisher site journal article supplement (doi:10.1515/jpm-2024-0427), 2024-12-06
Supplement: Supplementary file 1 [file j_jpm-2024-0427_suppl_001.docx]

**S1 Table Description of the baseline and outcome parameters for the different CPR cut-off values**

|  | Parameter | Entire cohort  (n=491) | CPR<1.0  (n=11; 2.2%) | CPR>1.0  (n=480; 97.8%) | p | CPR<1.192  (n=69; 14.1%) | CPR>1.192  (n=422; 85.9%) | p | CPR<1.269  (n=99; 20.2%) | CPR>1.269 (n=387; 78.8%) | p |
| --- | --- | --- | --- | --- | --- | --- | --- | --- | --- | --- | --- |
| Baseline Parameter | Maternal age (years) | 31 (28-23) | 32 (30-37) | 31 (28-34) | 0.122 | 31 (27-35) | 30 (27-33) | 0.308 | **30.5 (27-34)** | **30 (27-33)** | **0.036*** |
|  | Maternal Age >28.5 | 328 (66.8) | 9 (81.2) | 319 (66.5) | 0.352 | 49 (71.0) | 279 (66.1) | 0.423 | 73 (73.7) | 255 (65.1) | 0.101 |
|  | Parity | 0 (0-1) | 0 (0-1) | 0 (0-1) | 0.108 | **0 (0-0)** | **0 (0-0)** | **0.015*** | **0 (0-1)** | **0.5 (0-1)** | **0.044*** |
|  | Nulliparity | 255 (52.9) | 8 (72.3) | 247 (51.5) | 0.163 | **47 (68.1)** | **208 (49.3)** | **0.004*** | **64 (64.6)** | **191 (48.7)** | **0.005*** |
|  | Gravidity | 2 (1-3) | 1 (1-3) | 2 (1-3) | 0.798 | 1 (1-3) | 2 (1-2) | 0.120 | 1(1-2.25) | 2 (1-3) | 0.059 |
|  | Maternal pre-pregnancy BMI (kg/m2) | 23.5 (21.0-27.6) | 25.7 (22.5 -28.7) | 23.4 (21.0-27.6) | 0.150 | 24.8 (22.5-27.3) | 23.1 (21.2-27.3) | 0.293 | 23.65 (21.25-26.63) | 23.4 (21.13-27.63) | 0.590 |
|  | Obesity (BMI>30) | 71 (14.7) | 2 (18.2) | 69 (14.4) | 0.669 | 10 (14.5) | 61 (14.7) | 0.958 | 13 (13.1) | 58 (15.0) | 0.686 |
|  | Smoking | 22 (6.4) | 0 (0) | 22 (6.5) | >0.99 | 2 (4.8) | 20 (6.7) | >0.99 | 3 (13.6) | 19 (6.8) | 0.777 |
|  | Pre-existing cardiovascular diseases | 29 (5.9) | 1 (9.1) | 28 (5.8) | 0.492 | 2 (2.9) | 27 (6.4) | 0.406 | 4 (4.0) | 25 (6.4) | 0.378 |
|  | DM or GDM | 81 (16.5) | 4 (36.4) | 77 (16.0) | 0.09 | 10 (14.5) | 71 (16.8) | 0.629 | 14 (14.1) | 67 (17.1) | 0.480 |
|  | Placental insufficiency | 39 (7.9) | 2 (18.2) | 37 (7.7) | 0.215 | 8 (11.6) | 31 (7.3) | 0.226 | 11 (11.1) | 28 (7.1) | 0.192 |
|  | Oligohydramnions | 13 (2.6) | 0 (0) | 13 (2.7) | >0.99 | 2 (2.9) | 11 (2.6) | 0.702 | 2 (2.0) | 11 (2.8) | >0.99 |
| US parameters | Fetal weight percentile | 41 (25.0-61.5) | 33.0 (24.0-45.0) | 41.5 (25.0-61.9) | 0.406 | 44.0 (24.0-57.5) | 41.0 (25.4-62.0) | 0.890 | 43 (22.75-58.43) | 43 (27.15-62.3) | 0.358 |
|  | Umbilical PI | 0.77 (0.69-0.87) | 0.98 (0.83-1.1) | 0.77 (0.69-0.86) | **<0.001*** | 0.85 (0.82-1.0) | 0.74 (0.67-0.85) | **<0.01*** | 0.86 (0.82-0.98) | 0.74 (0.66-0.83) | **<0.001*** |
|  | ACM PI | 1.28 (1.08-1.49) | 0.82 (0.78-0.96) | 1.29 (1.09-1.5) | **<0.001*** | 0.94 (0.87-1.05) | 1.29 (1.14-1.52) | **<0.01*** | 0.96 (0.87-1.11) | 1.32 (1.15-1.53) | **<0.001*** |
|  | CPR | 1.63 (1.33- 2.04) | 0.92 (0.88-0.96) | 1.66 (1.36-2.07) | **<0.001*** | 1.09 (1.02-1.15) | 1.72 (1.42-2.14) | **<0.01*** | 1.14 (1.05 -1.2) | 1.79 (1.48-2.17) | **<0.001*** |
|  | UCR | 0.61 (0.49- 0.75) | 1.09 (1.04-1.14) | 0.60 (0.48- 0.74) | **<0.001*** | 0.92 (0.87-0.98) | 0.58 (0.47-0.71) | **<0.01*** | 0.88 (0.83- 0.95) | 0.56 (0.46- 0.68) | **<0.001*** |
|  | Uterine mean PI | 0.63 (0.55-0.74) | 0.72 (0.49-0.79) | 0.63 (0.55-0.74) | 0.684 | 0.66 (0.51-0.72) | 0.63 (0.55-0.75) | 0.598 | 0.67 (0.52-0.74) | 0.62 (0.55-0.75) | 0.501 |
| Pregnancy and Perinatal outcome | Gestational age at birth (in days) | 283 (281-287) | 287 (283-288) | 283 (281-287) | 0.140 | 284 (281-287) | 283 (281-288) | 0.864 | 282.5 (281-287) | 284 (281-288) | 0.245 |
|  | Mode of delivery: |  |  |  |  |  |  |  |  |  |  |
|  | spontaneous | 370 (75.4) | 6 (54.5) | 364 (75.8) | 0.149 | **44 (63.8)** | **326 (77.3)** | **0.016*** | 68 (68.7) | 302 (77) | 0.085 |
|  | vaginal operative | 42 (8.6) | 1 (9.1) | 41 (8.5) | >0.99 | 6 (8.7) | 36 (8.5) | 0.964 | 8 (8.1) | 34 (8.7) | 0.851 |
|  | Emergency C-section | 79 (16.1) | 4 (36.4) | 75 (15.6) | 0.08 | **19 (27.5)** | **60 (14.2)** | **0.005*** | **23 (23.2)** | **56 (14.3)** | **0.030*** |
|  | Induction of labor | 279 (56.8) | 9 (81.8) | 270 (56.3) | 0.125 | 42 (60.9) | 237 (56.2) | 0.464 | 55 (55.6) | 224 (57.1) | 0.776 |
|  | Gender female | 233 (47.5) | 5 (45.5) | 228 (47.5) | 0.893 | 30 (43.5) | 203 (48.1) | 0.476 | 56 (56.6) | 202 (51.5) | 0.370 |
|  | Gender male | 258 (52.5) | 6 (54.5) | 252 (52.5) | 0.893 | 39 (56.5) | 219 (51.9) | 0.476 | 43 (43.4) | 190 (48.5) | 0.370 |
|  | Birth weight Children (in g) | 3545 (3300-3815) | **3240 (2970-3450)** | **3550 (3300-3820)** | **0.01*** | **3620 (3305-3710)** | **3570 (3300-3840)** | **0.002*** | **3570 (3239-3716)** | **3575 (3310-3844)** | **0.002*** |
|  | Percentile (Voigt) | 44 (23-66) | **14.0 (10.0-25.0)** | **44.5 (24-67)** | **0.005*** | **43 (21-61)** | **45 (26-67)** | **0.001*** | **43.5 (18.75-61)** | **45 (26.5-67.75)** | **0.002*** |
|  | Umbilical cord pH | 7.22 (7.17-7.28) | 7.24 (7.16-7.29) | 7.22 (7.17-7.28) | 0.912 | 7.19 (7.17-7.29) | 7.22 (7.16-7.27) | 0.907 | 7.22 (7.17-7.29) | 7.22 (7.16-7.27) | 0.942 |
|  | Umbilical cord BE | -4.4 (-7.0- -2.3) | -5.0 (-8.4- -3.4) | -4.4 (-6.9- -2.3) | 0.446 | **-5.6 (-7.7- -3.2)** | **- 4.7 (-7.0- -1.9)** | **0.003*** | -5.2 (-7.28- -2.45) | -4.7 (-7.0- -2.1) | 0.057 |
|  | APGAR 5 | 9 (9-10) | 9 (8-10) | 9 (9-10) | 0.253 | 9 (9-10) | 9 (9-10) | 0.106 | 9 (9-10) | 9 (9-10) | 0.253 |
|  | Admission to NICU | 30 (6.1) | 1 (9.1) | 29 (6.0) | 0.504 | 8 (11.6) | 22 (5.2) | 0.054 | **11 (11.1)** | **19 (4.8)** | **0.020*** |

Data are n (%) or median (interquartile range) unless otherwise specified. * significant if p < 0.05; CPR <1.192 = 10. Percentile of Ciobanu et al. (40 weeks); CPR <1.269: calculated Cut-off; DM or GDM: diabetes or gestational diabetes; PI: pulsatility index; ACM: fetal A. cerebri media; CPR: cerebral placental ratio; UCR: umbilicocerebral ratio; NICU: neonatal intensive care unit
